# Supplementary material for: The Dual-Targeted Peptide Conjugated Probe for Depicting Residual Nasopharyngeal Carcinoma and Guiding Surgery
Source: MDPI journal article supplement (doi:10.3390/bios12090729), 2022-09-05
Supplement: s1 [file s1]

Supplementary Materials

# The Dual-Targeted Peptide Conjugated Probe for Depicting Residual Nasopharyngeal Carcinoma and Guiding Surgery

Wenhui Huang <sup>1,2,3</sup>, Zicong He <sup>2</sup>, Xuekang Cai <sup>4</sup>, Jingming Zhang <sup>4</sup>, Wei Li <sup>2,3</sup>, Kun Wang <sup>3,\*</sup> and Shuixing Zhang <sup>2,\*</sup>

<sup>1</sup> College of Medicine and Biological Information Engineering, Northeastern University, Shenyang 110167, China

<sup>2</sup> Medical Imaging Center, the First Affiliated Hospital, Jinan University, Guangzhou 510630, China

<sup>3</sup> CAS Key Laboratory of Molecular Imaging, the State Key Laboratory of Management and Control for Complex Systems, Institute of Automation, Chinese Academy of Sciences, Beijing 100190, China

<sup>4</sup> Department of Nuclear Medicine, Peking University First Hospital, Beijing 100034, China

\* Correspondence: kun.wang@ia.ac.cn (K.W.); zsx7515@jnu.edu.cn (S.Z.); Tel.: +86-13544597585 (S.Z.); +86-18612965656 (K.W.)

(a) FITC-FY-35

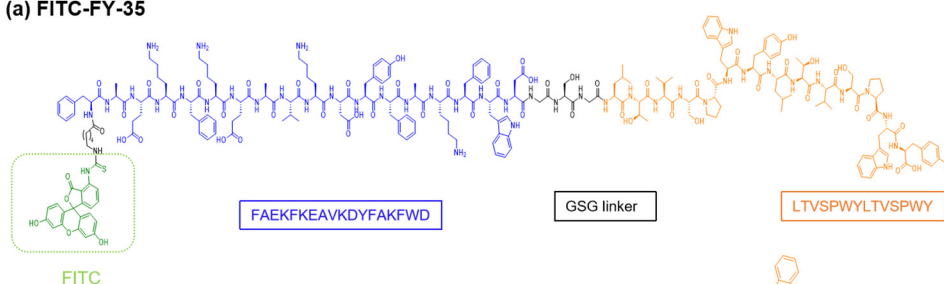

(b) FITC-FL-35

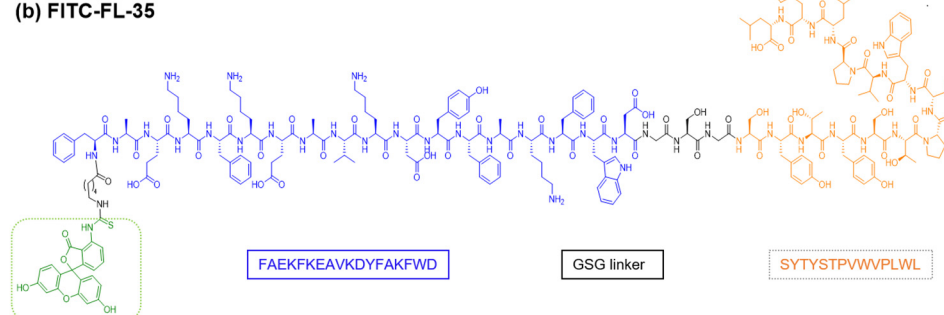

**Figure S1.** The chemical structure of FITC-FY-35 and FITC-FL-35.

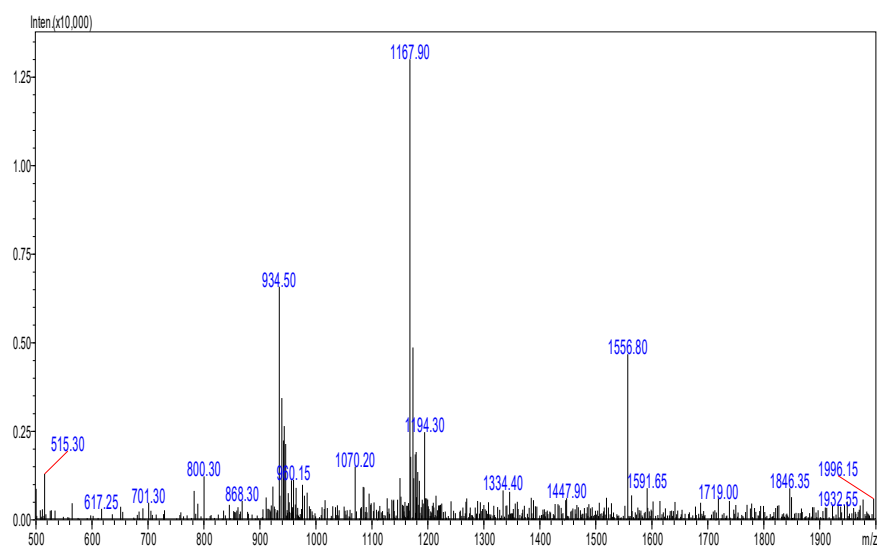

**Figure S2.** Mass spectra of FITC-FY-35.

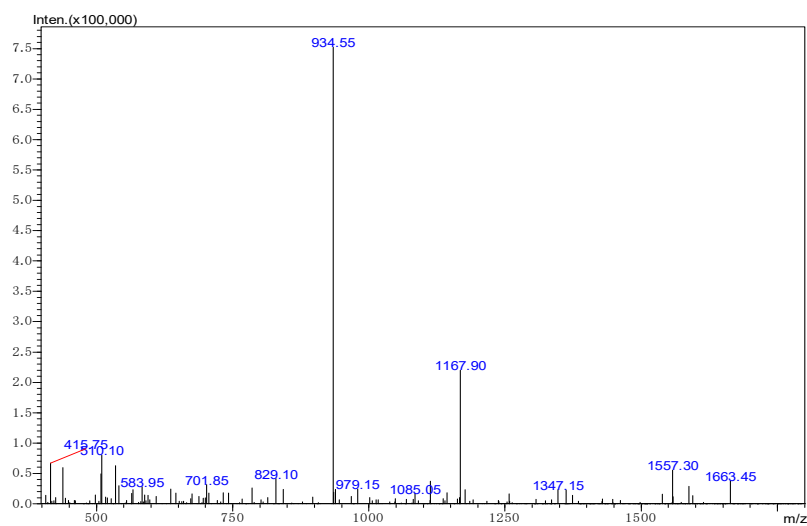

**Figure S3.** Mass spectra of FITC-FL-35.

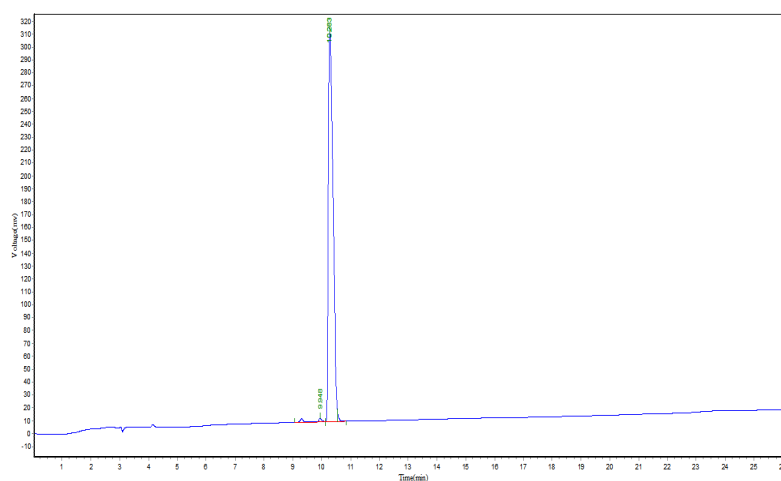

**Figure S4.** HPLC for FITC-FY-35.

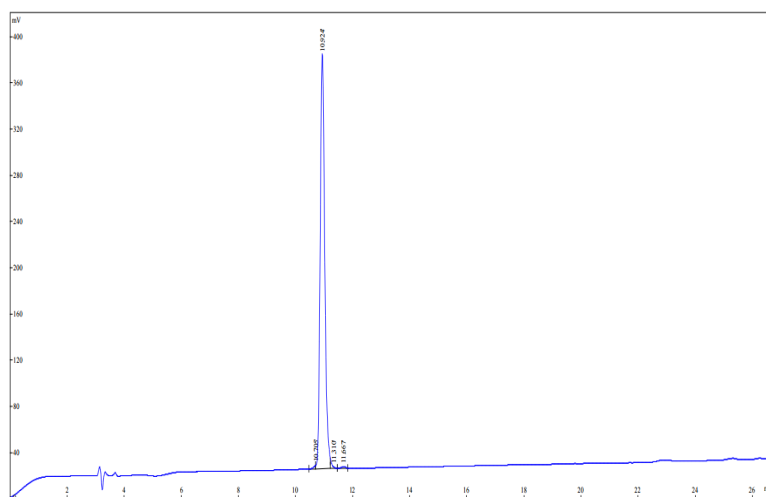

**Figure S5.** HPLC for FITC-FL-35.

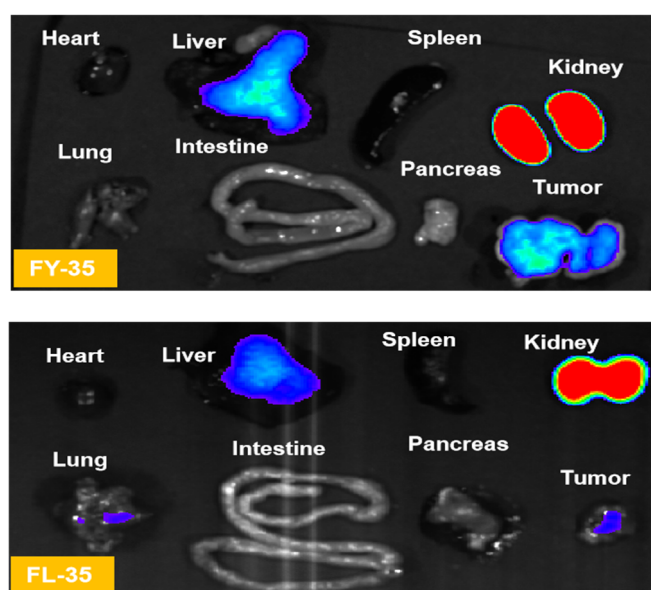

**Figure S6.** *Ex vivo* fluorescent imaging for the resected organs and tumours in two groups.
